# Supplementary material for: Pan-cancer analysis of Homeobox B9 as a predictor for prognosis and immunotherapy in human tumors
Source: publisher site journal article supplement (doi:10.18632/aging.204785), 2023-06-09
Supplement: Supplementary file [file aging-v15i11-204785-supplementary-material-SD1.pdf]

SUPPLEMENTARY FIGURES

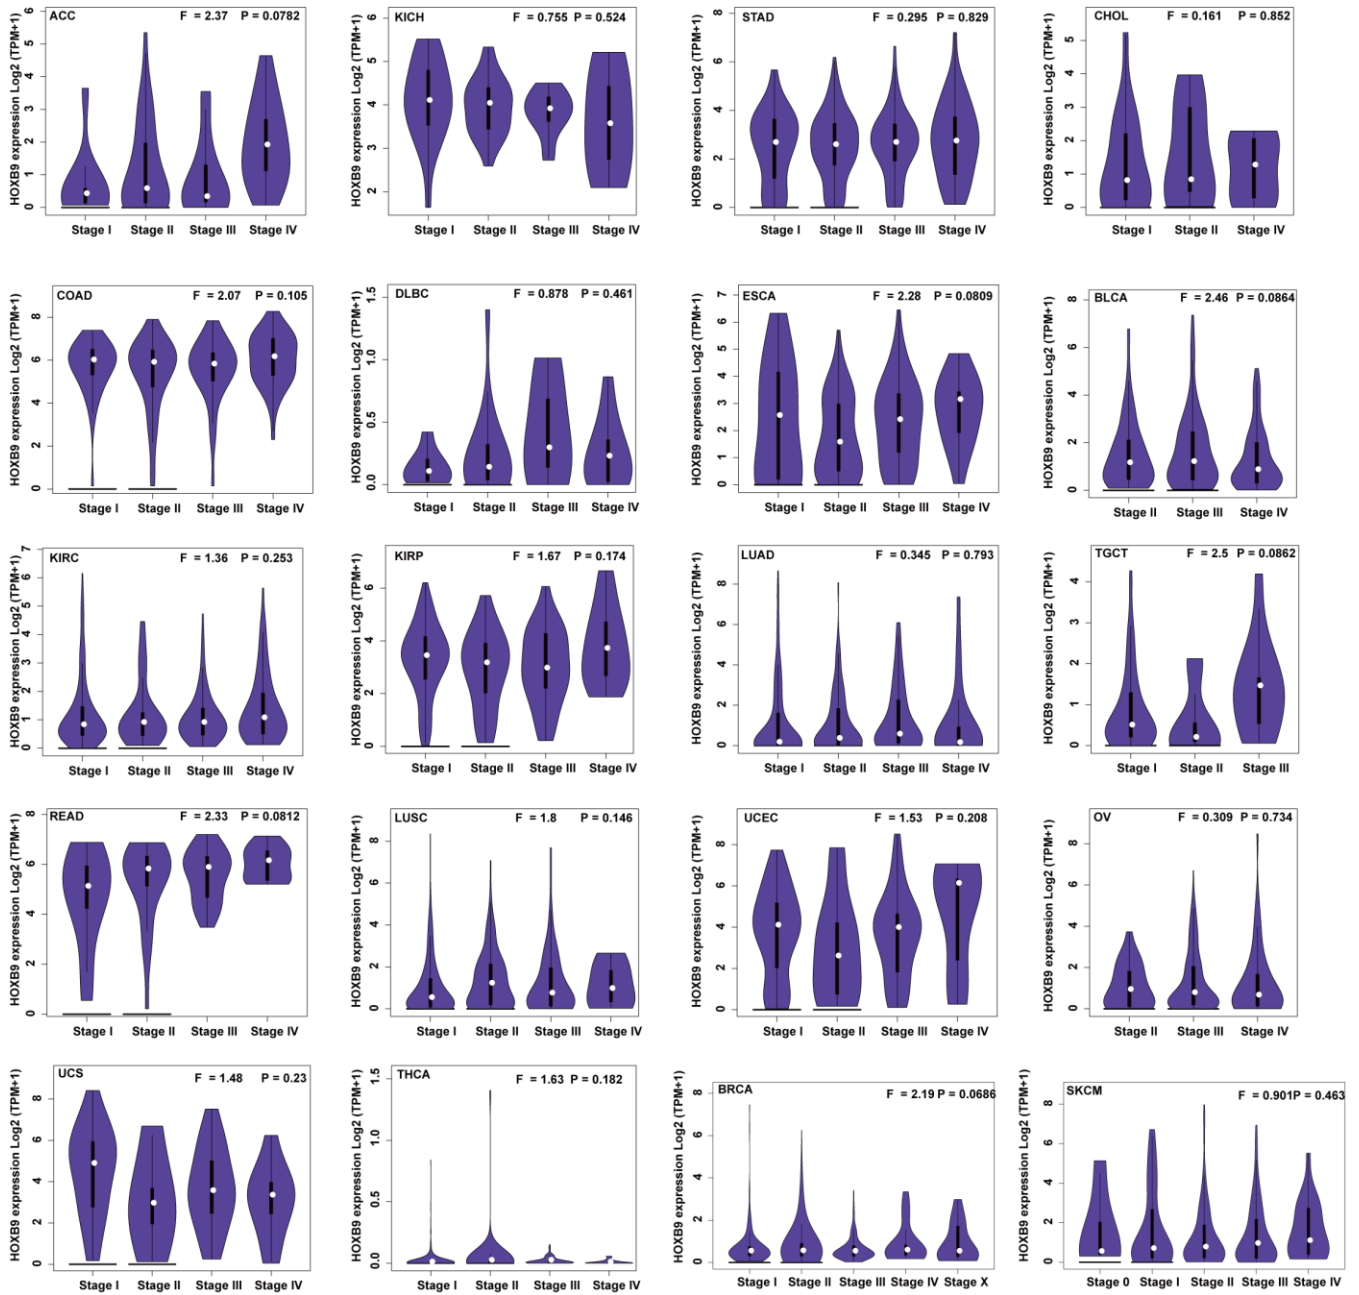

Supplementary Figure 1. Based on the TCGA data, the expression levels of the HOXB9 gene were analyzed by the main pathological stages in 20 cancers.

## Single cell expression of HOXB9 in pan-cancer

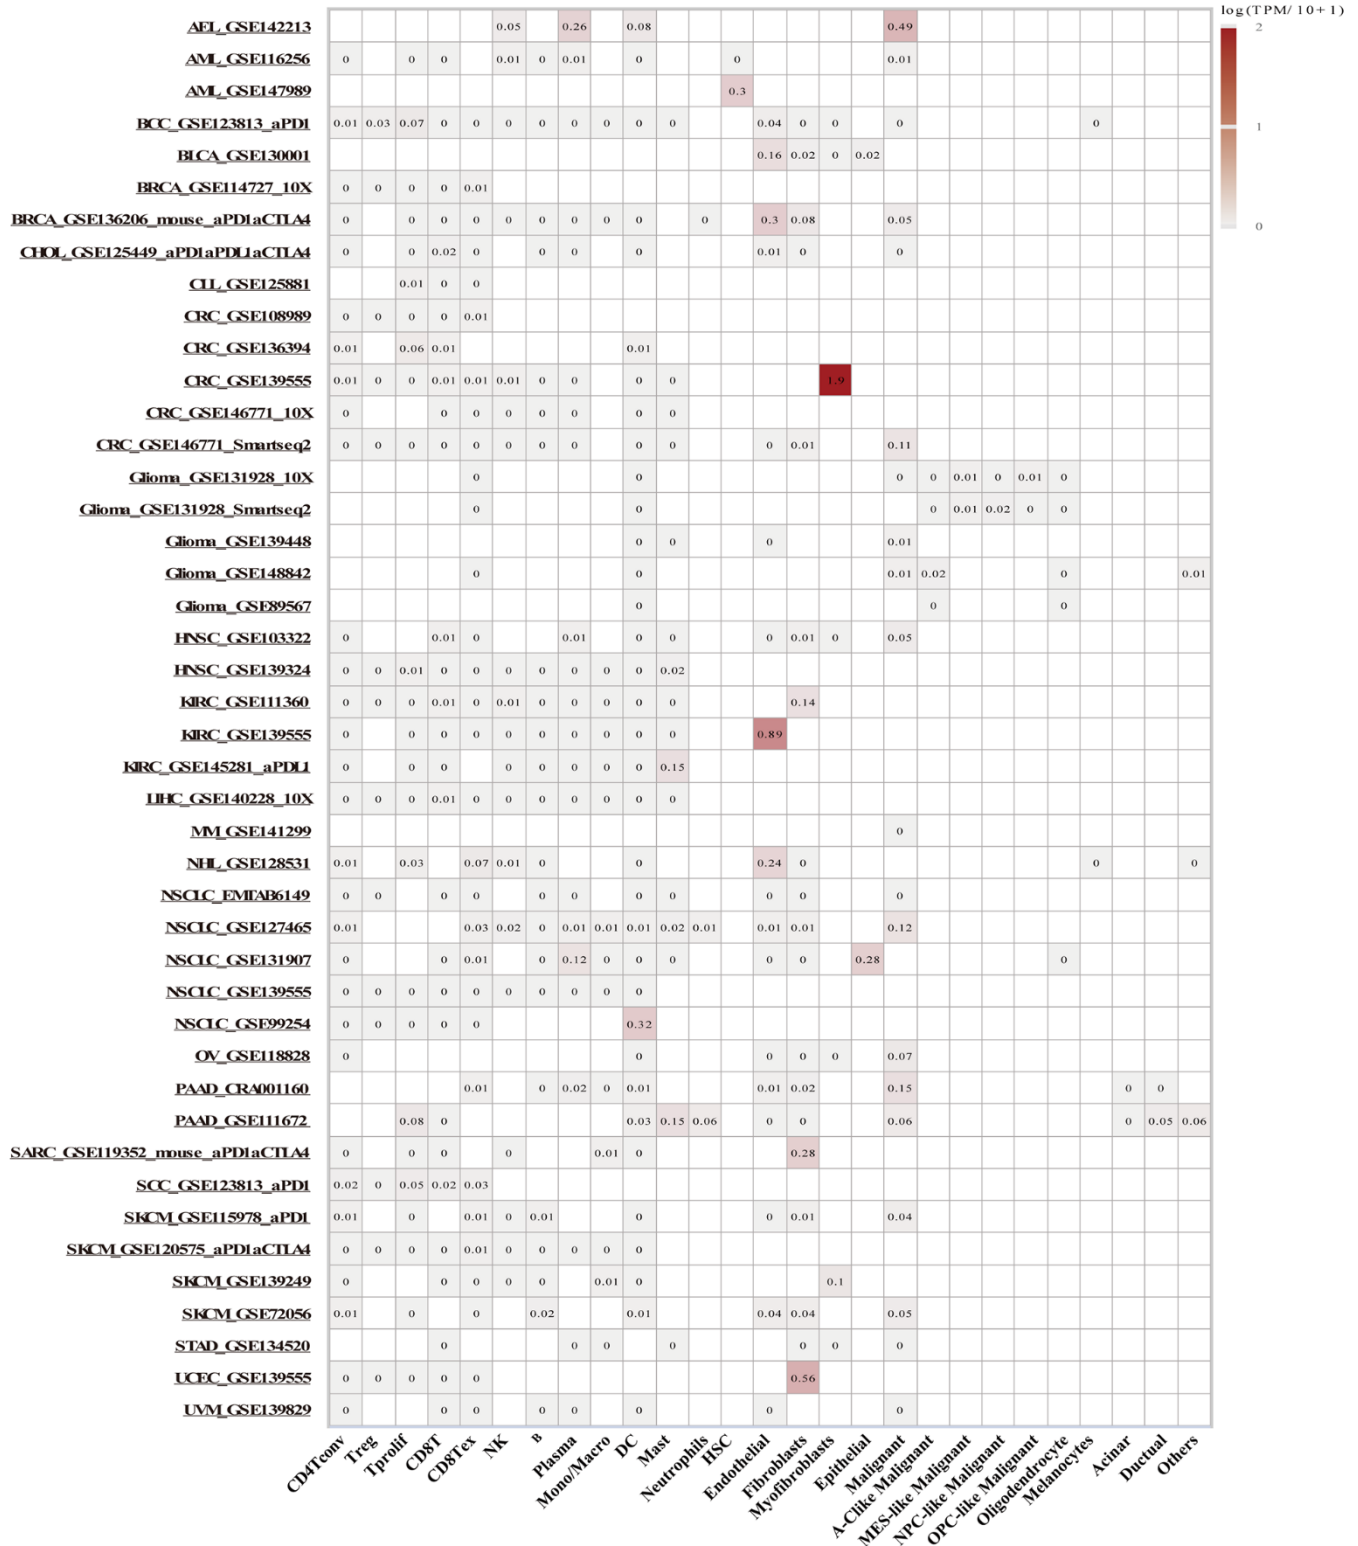

Supplementary Figure 2. HOXB9 expression at the single-cell level in the pan-cancer analysis.

## Relationship between HOXB9 expression and the immunescores.

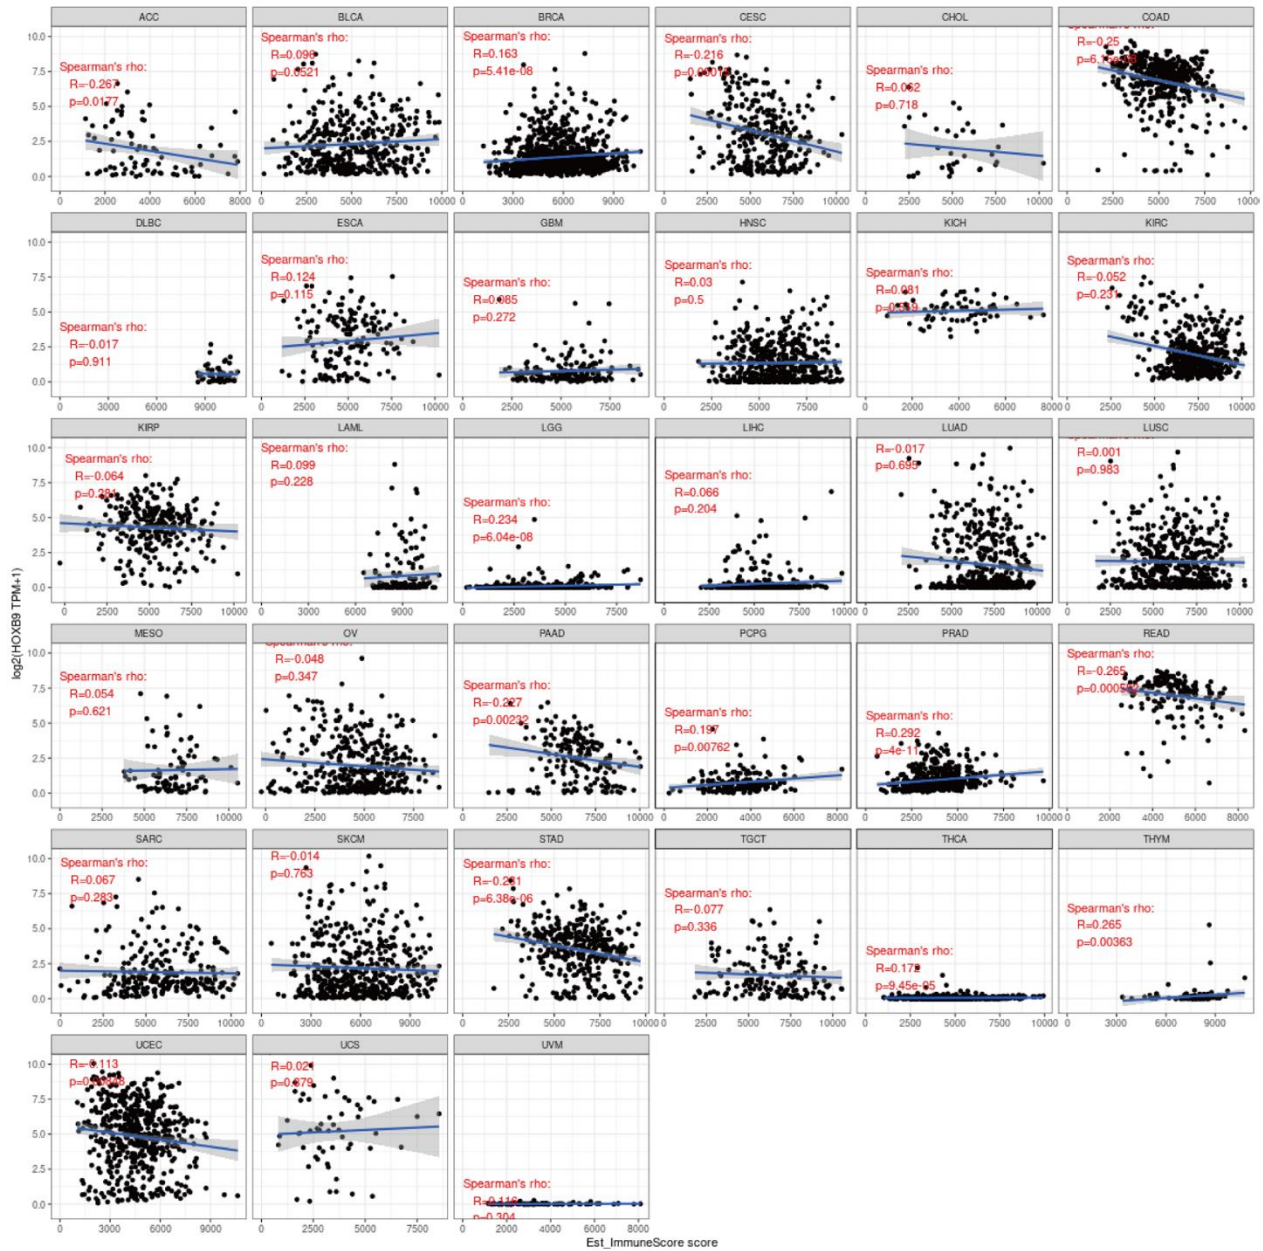

Supplementary Figure 3. Correlation analysis between expression levels of HOXB9 and immunescore in pan-cancer.

## Relationship between HOXB9 expression and the estimatescores.

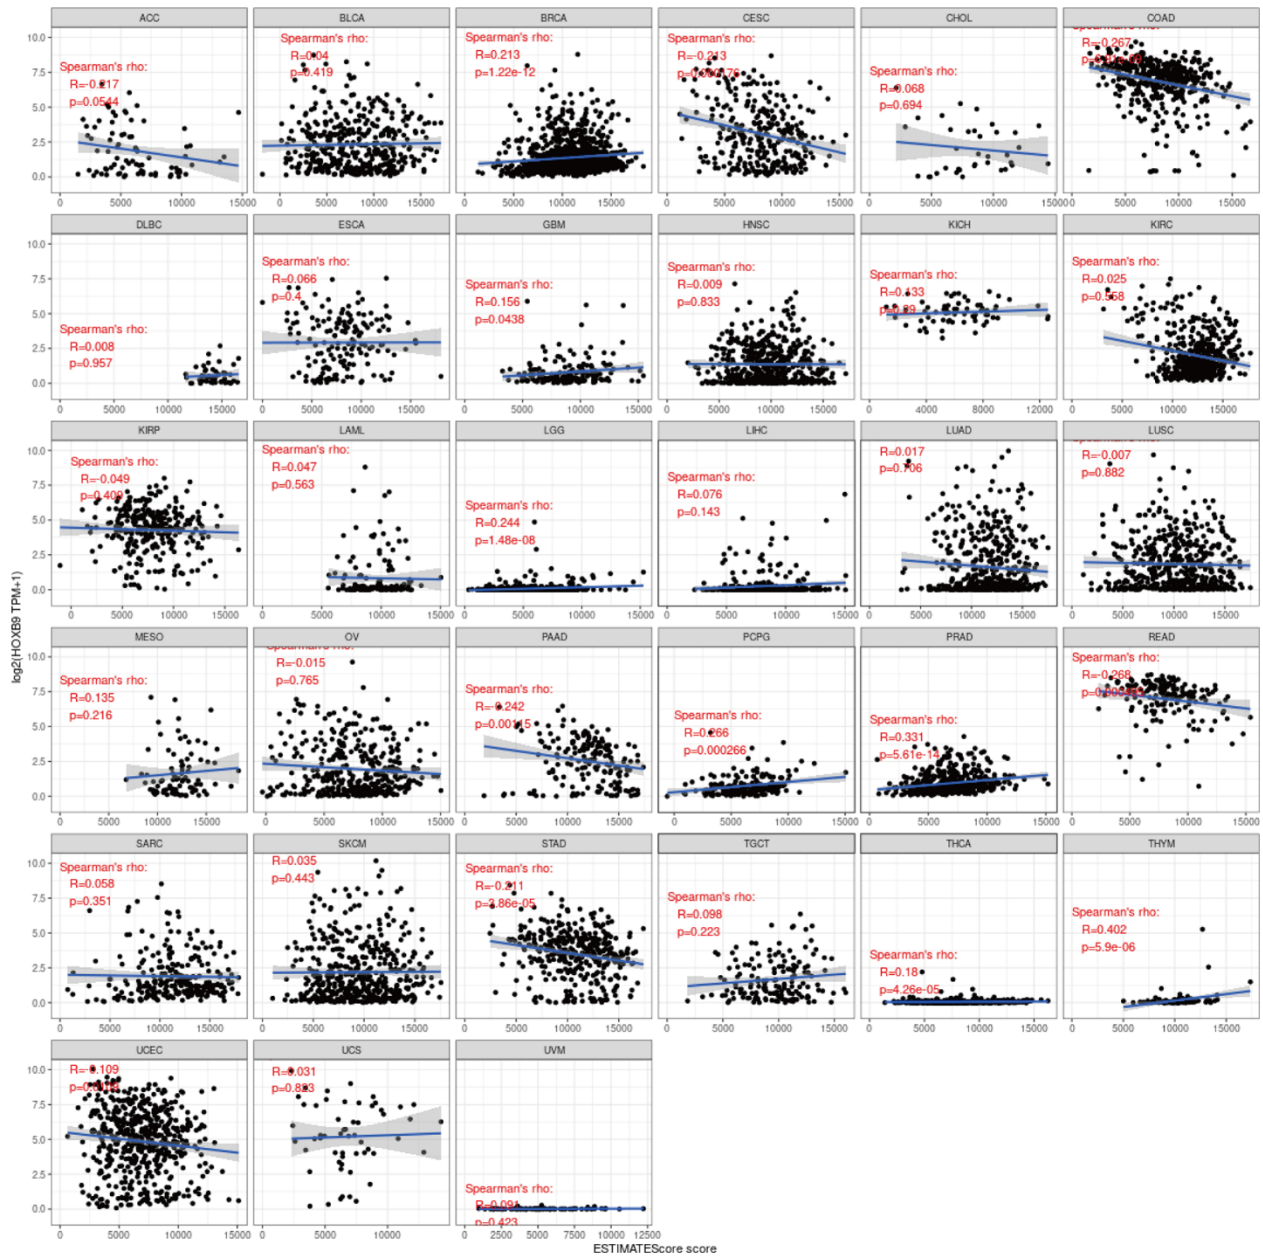

Supplementary Figure 4. Correlation analysis between expression levels of HOXB9 and estimatescore in pan-cancer.

## Relationship between HOXB9 expression and the stromalscores

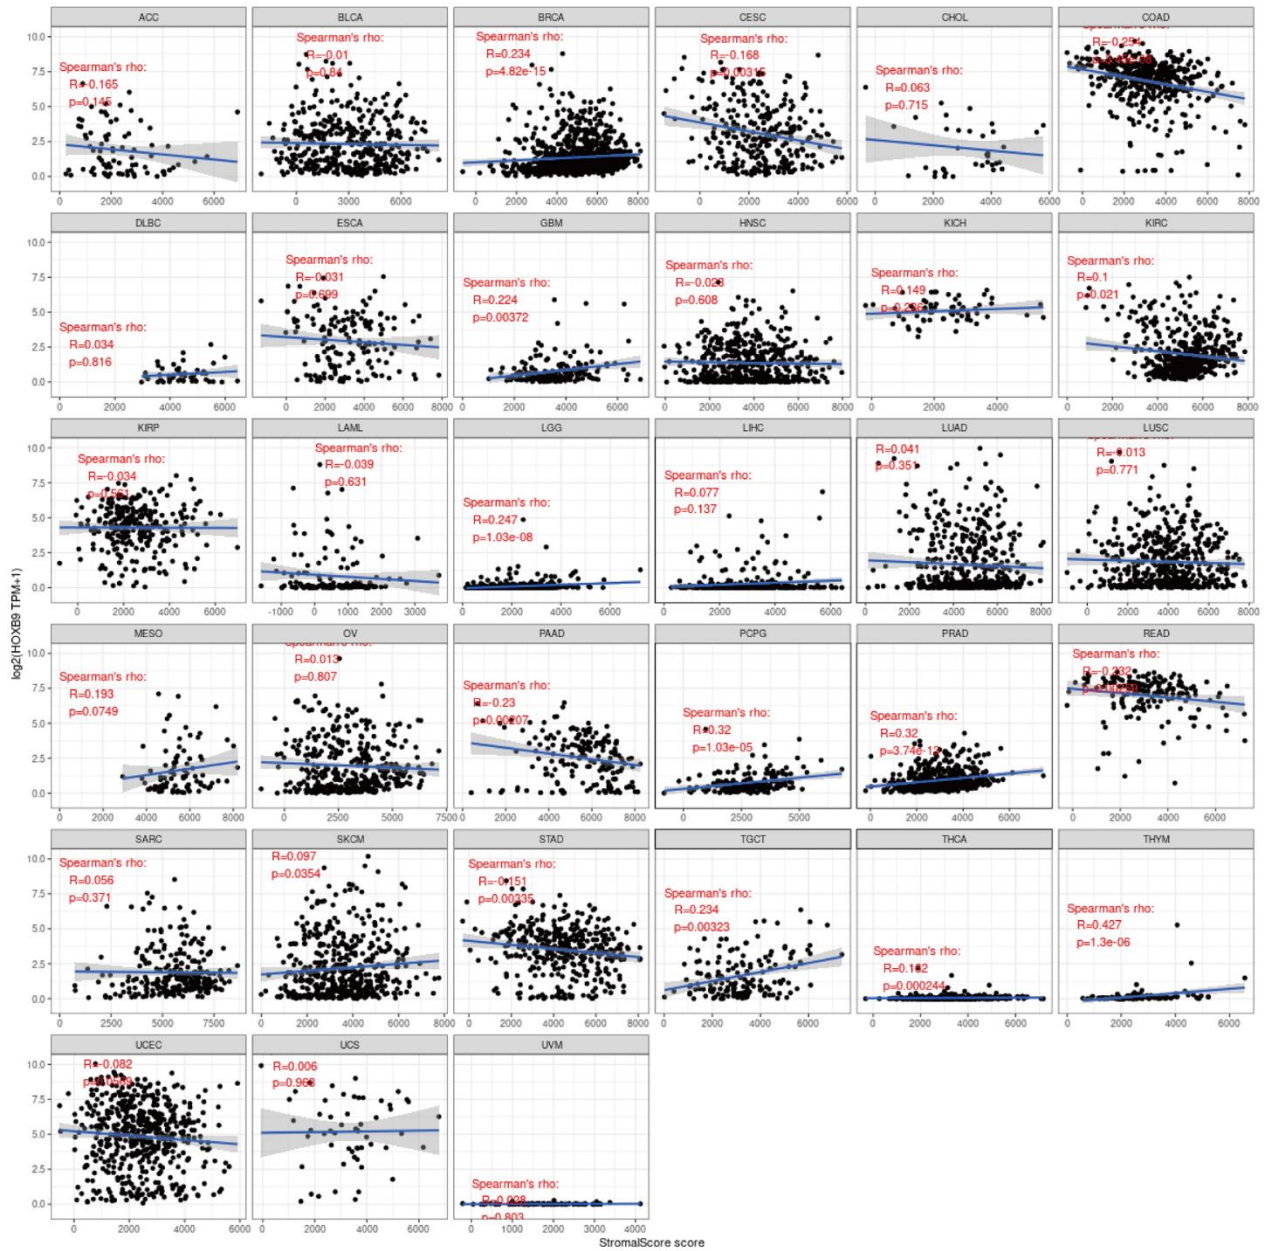

Supplementary Figure 5. Correlation analysis between expression levels of HOXB9 and stromalscore in pan-cancer.

## Relationship between HOXB9 levels and neoantigens in pan-cancer

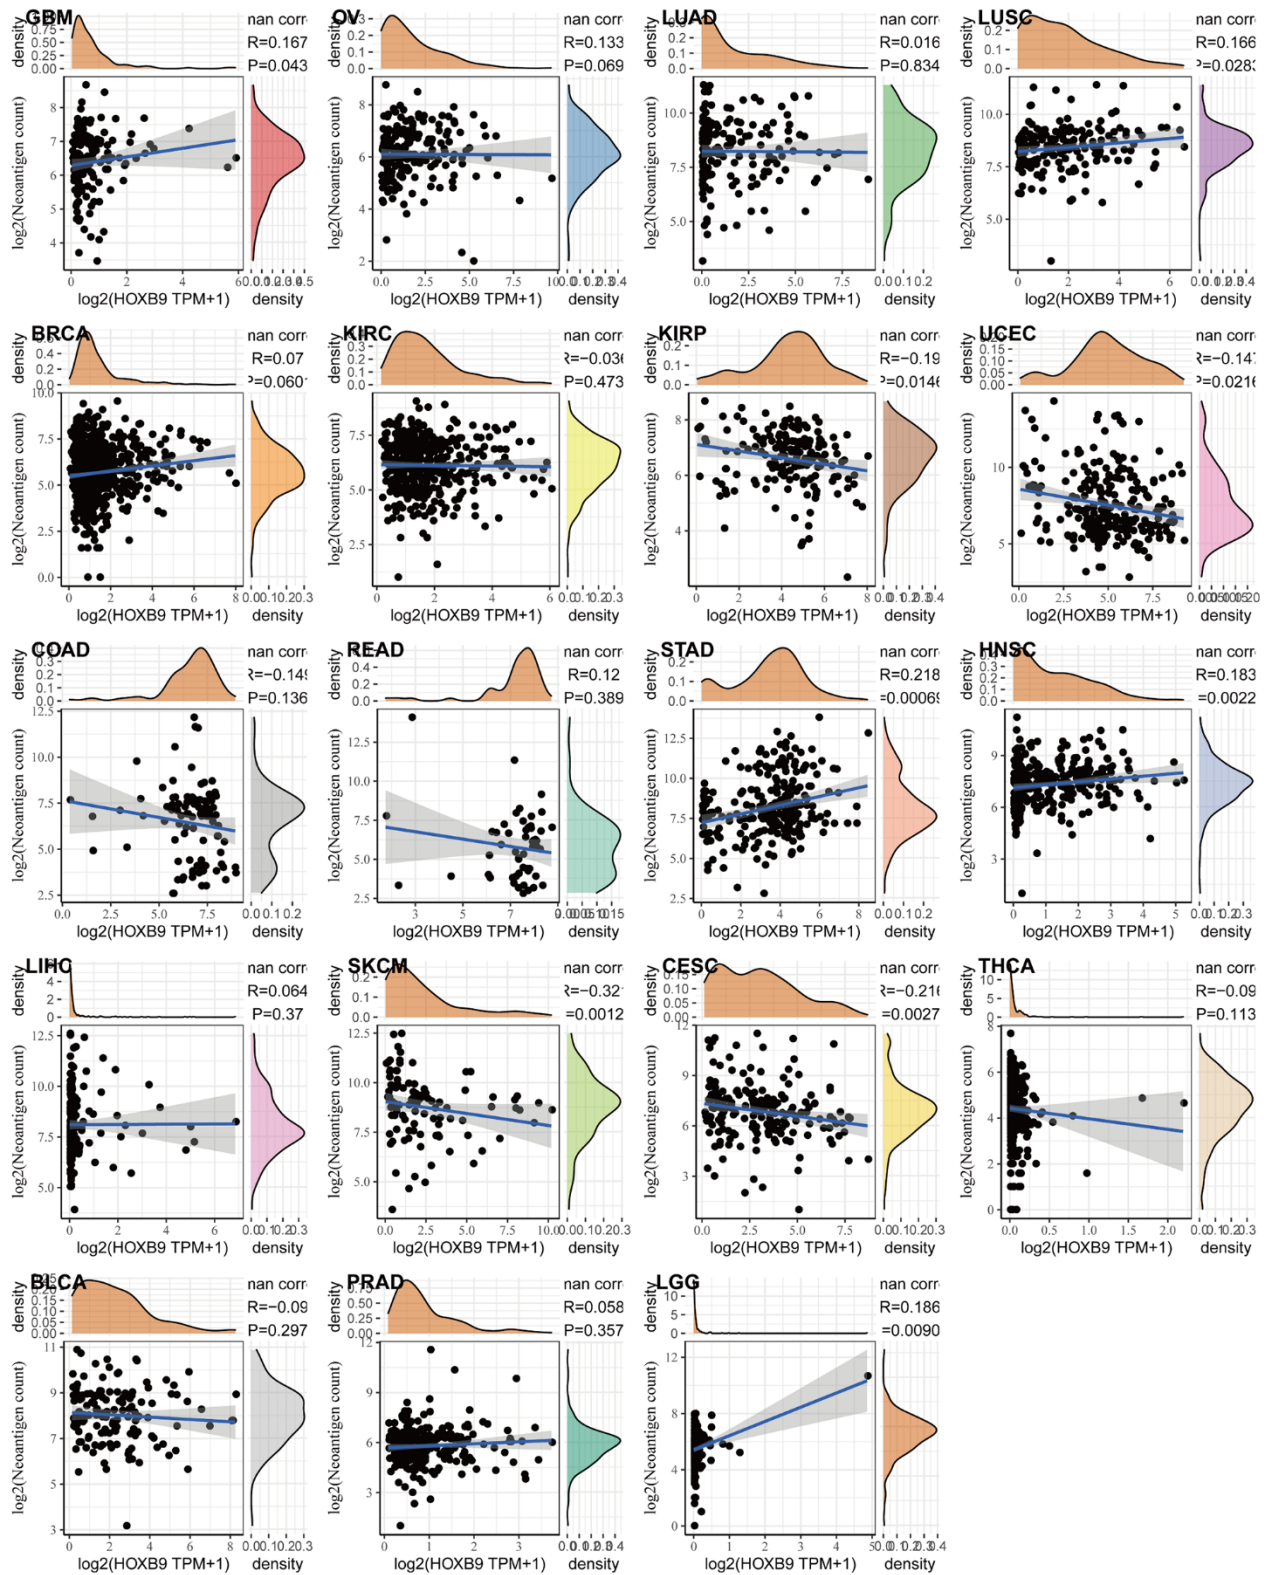

Supplementary Figure 6. Correlation analysis between HOXB9 expression in pan-cancer and the number of tumors neoantigens in pan-cancer.
