# Supplementary material for: Pan-cancer analysis of Homeobox B9 as a predictor for prognosis and immunotherapy in human tumors
Source: publisher site journal article supplement (doi:10.18632/aging.204785), 2023-06-09
Supplement: Supplementary file [file aging-v15i11-204785-supplementary-material-SD2.pdf]

## SUPPLEMENTARY TABLES

**Supplementary Table 1. Abbreviations of cancers.**

| <b>Abbreviations</b> | <b>Full name</b>                                                 |
|----------------------|------------------------------------------------------------------|
| ACC                  | Adrenocortical carcinoma                                         |
| BLCA                 | Bladder Urothelial Carcinoma                                     |
| BRCA                 | Breast invasive carcinoma                                        |
| CESC                 | Cervical squamous cell carcinoma and endocervical adenocarcinoma |
| CHOL                 | Cholangiocarcinoma                                               |
| COAD                 | Colon adenocarcinoma                                             |
| COADREAD             | Colon adenocarcinoma/Rectum adenocarcinoma Esophageal carcinoma  |
| DLBC                 | Lymphoid Neoplasm Diffuse Large B-cell Lymphoma                  |
| ESCA                 | Esophageal carcinoma                                             |
| FPPP                 | FFPE Pilot Phase II                                              |
| GBM                  | Glioblastoma multiforme                                          |
| GBMLGG               | Glioma                                                           |
| HNSC                 | Head and Neck squamous cell carcinoma                            |
| KICH                 | Kidney Chromophobe                                               |
| KIPAN                | Pan-kidney cohort (KICH+KIRC+KIRP)                               |
| KIRC                 | Kidney renal clear cell carcinoma                                |
| KIRP                 | Kidney renal papillary cell carcinoma                            |
| LAML                 | Acute Myeloid Leukemia                                           |
| LGG                  | Brain Lower Grade Glioma                                         |
| LIHC                 | Liver hepatocellular carcinoma                                   |
| LUAD                 | Lung adenocarcinoma                                              |
| LUSC                 | Lung squamous cell carcinoma                                     |
| MESO                 | Mesothelioma                                                     |
| OV                   | Ovarian serous cystadenocarcinoma                                |
| PAAD                 | Pancreatic adenocarcinoma                                        |
| PCPG                 | Pheochromocytoma and Paraganglioma                               |
| PRAD                 | Prostate adenocarcinoma                                          |
| READ                 | Rectum adenocarcinoma                                            |
| SARC                 | Sarcoma                                                          |
| STAD                 | Stomach adenocarcinoma                                           |
| SKCM                 | Skin Cutaneous Melanoma                                          |
| STES                 | Stomach and Esophageal carcinoma                                 |
| TGCT                 | Testicular Germ Cell Tumors                                      |
| THCA                 | Thyroid carcinoma                                                |
| THYM                 | Thymoma                                                          |
| UCEC                 | Uterine Corpus Endometrial Carcinoma                             |
| UCS                  | Uterine Carcinosarcoma                                           |
| UVM                  | Uveal Melanoma                                                   |
| OS                   | Osteosarcoma                                                     |
| ALL                  | Acute Lymphoblastic Leukemia                                     |

**Supplementary Table 2. The relevant reagents used in this article.**

| <b>REAGENT</b>             | <b>SOURCE</b>                       | <b>IDENTIFIER</b> |
|----------------------------|-------------------------------------|-------------------|
| Rabbit Anti-HOXB9          | SANTA CRUZ BIOTECHNOLOGY            | Cat# sc-130377    |
| Rabbit Anti- Alpha Tubulin | Proteintech                         | Cat# 11224-1-AP   |
| DAPI                       | Sigma-Aldrich                       | Cat# D9542        |
| Crystal violet             | Solarbio                            | Cat# C8470        |
| Fetal bovine serum         | Gibco                               | Cat# 10099141     |
| PBS                        | ZSGB-BIO                            | Cat# ZLI 9061     |
| Cell Counting Kit-8 Kit    | Beyotime Institute of Biotechnology | Cat#C0037         |
| Edu Kit                    | Ribobio                             | Cat#C10310        |
| BCA protein assay kit      | Beyotime                            | Cat#P0012         |

**Supplementary Table 3. Primer sequences for qPCR.**

| <b>Name</b>                       | <b>Sequences</b>               |
|-----------------------------------|--------------------------------|
| <b>Primers for real-time PCR:</b> |                                |
| HOXB9 sense:                      | 5'-CCATTTCTGGGACGCTTAGCA-3'    |
| HOXB9 antisense:                  | 5'-TGTAAGGGTGGTAGACGGACG-3'    |
| GAPDH sense:                      | 5'-GGTCGGAGTCAACGGATTTGGTCG-3' |
| GAPDH antisense:                  | 5'-CCTCCGACGCTGCTTCACCAC-3'    |
