# Supplementary material for: Pan-cancer analysis of Homeobox B9 as a predictor for prognosis and immunotherapy in human tumors
Source: Aging (Albany NY). 2023 Jun 9;15(11):5096–124. doi: 10.18632/aging.204785 (PMC10292867; doi:10.18632/aging.204785)
Supplement: Supplementary Table 4 [file aging-15-204785-s003.xlsx]

## Sheet: Sheet1
Supplementary Table 4. HOXB9 mutation information list.
Study of Origin	Sample ID	Cancer Type	Cancer Type Detailed	Protein Change	Annotation	Functional Impact	Mutation Type	Variant Type	Copy #	Ref	Var	TCGA PanCanAtlas Cancer Type Acronym	Months of disease-specific survival	Neoadjuvant Therapy Type Administered Prior To Resection Text	International Classification of Diseases for Oncology, Third Edition ICD-O-3 Histology Code	International Classification of Diseases for Oncology, Third Edition ICD-O-3 Site Code	Oncotree Code	Overall Survival (Months)	Overall Survival Status	Person Neoplasm Cancer Status	Progress Free Survival (Months)	Progression Free Status	Primary Lymph Node Presentation Assessment	Sample Type	Sex	Somatic Status	Subtype	Tissue Prospective Collection Indicator	Tissue Retrospective Collection Indicator	Tissue Source Site	TMB (nonsynonymous)	Tumor Disease Anatomic Site	Tumor Type
Lung Adenocarcinoma (TCGA, PanCancer Atlas)	TCGA-86-7954-01	Non-Small Cell Lung Cancer	Lung Adenocarcinoma	USP32-HOXB9 Fusion	OncoKB: Unknown, level NA, resistance NA;CIViC: NA;MyCancerGenome: not present;CancerHotspot: no;3DHotspot: no	MutationAssessor: NA;SIFT: NA;Polyphen-2: NA	fusion	NA	Gain	NA	NA	LUAD	19.8902	No	8250-03-01	C34.3	LUAD	19.8902	0:LIVING	Tumor Free	19.8902	0:CENSORED		Primary	Female	Matched	LUAD	Yes	No	Asterand	6.2	Lung	Lung Bronchioloalveolar Carcinoma, Non-Mucinous
Glioblastoma Multiforme (TCGA, PanCancer Atlas)	TCGA-06-0882-01	Glioblastoma	Glioblastoma Multiforme	F47L	OncoKB: NA;CIViC: NA;MyCancerGenome: not present;CancerHotspot: no;3DHotspot: no	MutationAssessor: impact: medium, score: 2;SIFT: impact: tolerated, score: 0.11;Polyphen-2: impact: benign, score: 0.425	Missense_Mutation	SNP	ShallowDel	G	C	GBM	20.7779	No	NA	NA	GBM	20.7779	1:DECEASED	NA	7.00266	1:PROGRESSION		Primary	Male	Matched	GBM_IDHwt	NA	NA	Henry Ford Hospital	1.06667	NA	Glioblastoma Multiforme (GBM)
Glioblastoma Multiforme (TCGA, PanCancer Atlas)	TCGA-06-0882-01	Glioblastoma	Glioblastoma Multiforme	Q32*	OncoKB: NA;CIViC: NA;MyCancerGenome: not present;CancerHotspot: no;3DHotspot: no	MutationAssessor: NA;SIFT: NA;Polyphen-2: NA	Nonsense_Mutation	SNP	ShallowDel	G	A	GBM	20.7779	No	NA	NA	GBM	20.7779	1:DECEASED	NA	7.00266	1:PROGRESSION		Primary	Male	Matched	GBM_IDHwt	NA	NA	Henry Ford Hospital	1.06667	NA	Glioblastoma Multiforme (GBM)
Lung Squamous Cell Carcinoma (TCGA, PanCancer Atlas)	TCGA-66-2785-01	Non-Small Cell Lung Cancer	Lung Squamous Cell Carcinoma	A182T	OncoKB: NA;CIViC: NA;MyCancerGenome: not present;CancerHotspot: no;3DHotspot: no	MutationAssessor: impact: low, score: 1.595;SIFT: impact: deleterious, score: 0;Polyphen-2: impact: probably_damaging, score: 0.992	Missense_Mutation	SNP	Diploid	C	T	LUSC	1.97258	No	8070-03-01	C34.1	LUSC	1.97258	0:LIVING	Tumor Free	1.97258	0:CENSORED		Primary	Male	Matched	LUSC	No	Yes	Indivumed	34.4667	Lung	Lung Squamous Cell Carcinoma (NOS)
Lung Squamous Cell Carcinoma (TCGA, PanCancer Atlas)	TCGA-66-2795-01	Non-Small Cell Lung Cancer	Lung Squamous Cell Carcinoma	K159N	OncoKB: NA;CIViC: NA;MyCancerGenome: not present;CancerHotspot: no;3DHotspot: no	MutationAssessor: impact: medium, score: 2.215;SIFT: impact: tolerated, score: 0.5;Polyphen-2: impact: benign, score: 0.003	Missense_Mutation	SNP	Gain	T	G	LUSC	4.01091	No	8070-03-01	C34.1	LUSC	4.01091	0:LIVING	Tumor Free	4.01091	0:CENSORED		Primary	Male	Matched	LUSC	No	Yes	Indivumed	13.5667	Lung	Lung Squamous Cell Carcinoma (NOS)
Lung Squamous Cell Carcinoma (TCGA, PanCancer Atlas)	TCGA-66-2769-01	Non-Small Cell Lung Cancer	Lung Squamous Cell Carcinoma	E217Q	OncoKB: NA;CIViC: NA;MyCancerGenome: not present;CancerHotspot: no;3DHotspot: no	MutationAssessor: impact: low, score: 0.995;SIFT: impact: deleterious, score: 0;Polyphen-2: impact: probably_damaging, score: 0.995	Missense_Mutation	SNP	ShallowDel	C	G	LUSC	7.06842	No	8070-03-01	C34.1	LUSC	7.06842	1:DECEASED	NA	7.06842	0:CENSORED		Primary	Male	Matched	LUSC	No	Yes	Indivumed	11.0667	Lung	Lung Squamous Cell Carcinoma (NOS)
Lung Squamous Cell Carcinoma (TCGA, PanCancer Atlas)	TCGA-85-A4QR-01	Non-Small Cell Lung Cancer	Lung Squamous Cell Carcinoma	A114E	OncoKB: NA;CIViC: NA;MyCancerGenome: not present;CancerHotspot: no;3DHotspot: no	MutationAssessor: impact: neutral, score: 0.695;SIFT: impact: tolerated, score: 0.74;Polyphen-2: impact: benign, score: 0.001	Missense_Mutation	SNP	Gain	G	T	LUSC	19.7258	No	8070-03-01	C34.1	LUSC	19.7258	0:LIVING	Tumor Free	19.7258	0:CENSORED		Primary	Male	Matched	LUSC	Yes	No	Asterand	7.03333	Lung	Lung Squamous Cell Carcinoma (NOS)
Lung Squamous Cell Carcinoma (TCGA, PanCancer Atlas)	TCGA-O2-A52N-01	Non-Small Cell Lung Cancer	Lung Squamous Cell Carcinoma	S141L	OncoKB: NA;CIViC: NA;MyCancerGenome: not present;CancerHotspot: no;3DHotspot: no	MutationAssessor: impact: low, score: 1.06;SIFT: impact: tolerated, score: 0.54;Polyphen-2: impact: benign, score: 0.003	Missense_Mutation	SNP	Gain	G	A	LUSC	33.0736	No	8070-03-01	C34.1	LUSC	33.0736	1:DECEASED	Tumor Free	33.0736	0:CENSORED		Primary	Male	Matched	LUSC	No	Yes	Washington University - CALGB	15.1333	Lung	Lung Squamous Cell Carcinoma (NOS)
Bladder Urothelial Carcinoma (TCGA, PanCancer Atlas)	TCGA-BT-A3PJ-01	Bladder Cancer	Bladder Urothelial Carcinoma	P29L	OncoKB: NA;CIViC: NA;MyCancerGenome: not present;CancerHotspot: no;3DHotspot: no	MutationAssessor: impact: low, score: 1.735;SIFT: impact: tolerated, score: 0.15;Polyphen-2: impact: benign, score: 0.247	Missense_Mutation	SNP	Diploid	G	A	BLCA	25.9394	No	8120-03-01	C67.2	BLCA	25.9394	0:LIVING	Tumor Free	25.9394	0:CENSORED	Yes	Primary	Male	Matched	BLCA	Yes	No	University of Pittsburgh	14.8	Bladder	Muscle Invasive Urothelial Carcinoma (PT2 or Above)
Bladder Urothelial Carcinoma (TCGA, PanCancer Atlas)	TCGA-BT-A3PJ-01	Bladder Cancer	Bladder Urothelial Carcinoma	P29S	OncoKB: NA;CIViC: NA;MyCancerGenome: not present;CancerHotspot: no;3DHotspot: no	MutationAssessor: impact: neutral, score: -0.48;SIFT: impact: tolerated, score: 0.61;Polyphen-2: impact: benign, score: 0.012	Missense_Mutation	SNP	Diploid	G	A	BLCA	25.9394	No	8120-03-01	C67.2	BLCA	25.9394	0:LIVING	Tumor Free	25.9394	0:CENSORED	Yes	Primary	Male	Matched	BLCA	Yes	No	University of Pittsburgh	14.8	Bladder	Muscle Invasive Urothelial Carcinoma (PT2 or Above)
Bladder Urothelial Carcinoma (TCGA, PanCancer Atlas)	TCGA-E5-A4TZ-01	Bladder Cancer	Bladder Urothelial Carcinoma	P120T	OncoKB: NA;CIViC: NA;MyCancerGenome: not present;CancerHotspot: no;3DHotspot: no	MutationAssessor: impact: low, score: 1.86;SIFT: impact: tolerated, score: 0.16;Polyphen-2: impact: probably_damaging, score: 0.939	Missense_Mutation	SNP	ShallowDel	G	T	BLCA	15.3533	Yes	8120-03-01	C67.9	BLCA	15.3533	1:DECEASED	With Tumor	14.3012	1:PROGRESSION	Yes	Primary	Male	Matched	BLCA	No	Yes	Roswell Park	14.0333	Bladder	Muscle Invasive Urothelial Carcinoma (PT2 or Above)
Uterine Corpus Endometrial Carcinoma (TCGA, PanCancer Atlas)	TCGA-AX-A05S-01	Endometrial Cancer	Uterine Endometrioid Carcinoma	R236W	OncoKB: NA;CIViC: NA;MyCancerGenome: not present;CancerHotspot: no;3DHotspot: no	MutationAssessor: impact: high, score: 4.47;SIFT: impact: deleterious, score: 0;Polyphen-2: impact: probably_damaging, score: 0.999	Missense_Mutation	SNP	Diploid	G	A	UCEC	13.5779	No	8380-03-01	C54.1	UEC	13.5779	1:DECEASED	With Tumor	11.1122	1:PROGRESSION		Primary	Female	Matched	UCEC_MSI	No	Yes	Gynecologic Oncology Group	16.5	Uterus	Endometrioid Endometrial Adenocarcinoma
Uterine Corpus Endometrial Carcinoma (TCGA, PanCancer Atlas)	TCGA-AP-A1DV-01	Endometrial Cancer	Uterine Endometrioid Carcinoma	R183H	OncoKB: NA;CIViC: NA;MyCancerGenome: not present;CancerHotspot: no;3DHotspot: no	MutationAssessor: impact: medium, score: 2.61;SIFT: impact: deleterious, score: 0;Polyphen-2: impact: probably_damaging, score: 0.994	Missense_Mutation	SNP	Diploid	C	T	UCEC	6.70678	No	8380-03-01	C54.1	UEC	6.70678	0:LIVING	Tumor Free	6.70678	0:CENSORED		Primary	Female	Matched	UCEC_POLE	No	Yes	MSKCC	404.6	Uterus	Endometrioid Endometrial Adenocarcinoma
Uterine Corpus Endometrial Carcinoma (TCGA, PanCancer Atlas)	TCGA-A5-A2K5-01	Endometrial Cancer	Uterine Endometrioid Carcinoma	I160S	OncoKB: NA;CIViC: NA;MyCancerGenome: not present;CancerHotspot: no;3DHotspot: no	MutationAssessor: impact: low, score: 1.79;SIFT: impact: tolerated, score: 0.51;Polyphen-2: impact: benign, score: 0.018	Missense_Mutation	SNP	Diploid	A	C	UCEC	24.723	No	8380-03-01	C54.1	UEC	24.723	0:LIVING	NA	24.723	0:CENSORED		Primary	Female	Matched	UCEC_POLE	Yes	No	Cedars Sinai	285.5	Uterus	Endometrioid Endometrial Adenocarcinoma
Uterine Corpus Endometrial Carcinoma (TCGA, PanCancer Atlas)	TCGA-AP-A0LM-01	Endometrial Cancer	Uterine Endometrioid Carcinoma	A177T	OncoKB: NA;CIViC: NA;MyCancerGenome: not present;CancerHotspot: no;3DHotspot: no	MutationAssessor: impact: low, score: 1.81;SIFT: impact: deleterious, score: 0;Polyphen-2: impact: probably_damaging, score: 0.995	Missense_Mutation	SNP	Diploid	C	T	UCEC	27.123	No	8380-03-01	C54.1	UEC	27.123	0:LIVING	Tumor Free	27.123	0:CENSORED		Primary	Female	Matched	UCEC_POLE	No	Yes	MSKCC	442.333	Uterus	Endometrioid Endometrial Adenocarcinoma
Uterine Corpus Endometrial Carcinoma (TCGA, PanCancer Atlas)	TCGA-AP-A0LM-01	Endometrial Cancer	Uterine Endometrioid Carcinoma	T140N	OncoKB: NA;CIViC: NA;MyCancerGenome: not present;CancerHotspot: no;3DHotspot: no	MutationAssessor: impact: low, score: 1.67;SIFT: impact: tolerated, score: 0.34;Polyphen-2: impact: benign, score: 0.029	Missense_Mutation	SNP	Diploid	G	T	UCEC	27.123	No	8380-03-01	C54.1	UEC	27.123	0:LIVING	Tumor Free	27.123	0:CENSORED		Primary	Female	Matched	UCEC_POLE	No	Yes	MSKCC	442.333	Uterus	Endometrioid Endometrial Adenocarcinoma
Uterine Corpus Endometrial Carcinoma (TCGA, PanCancer Atlas)	TCGA-AP-A1DK-01	Endometrial Cancer	Uterine Endometrioid Carcinoma	M208V	OncoKB: NA;CIViC: NA;MyCancerGenome: not present;CancerHotspot: no;3DHotspot: no	MutationAssessor: impact: neutral, score: -0.07;SIFT: impact: deleterious, score: 0;Polyphen-2: impact: possibly_damaging, score: 0.889	Missense_Mutation	SNP	Diploid	T	C	UCEC	90.9689	No	8380-03-01	C54.1	UEC	90.9689	0:LIVING	Tumor Free	90.9689	0:CENSORED		Primary	Female	Matched	UCEC_MSI	No	Yes	MSKCC	346.533	Uterus	Endometrioid Endometrial Adenocarcinoma
Uterine Corpus Endometrial Carcinoma (TCGA, PanCancer Atlas)	TCGA-AX-A2HC-01	Endometrial Cancer	Uterine Endometrioid Carcinoma	T140I	OncoKB: NA;CIViC: NA;MyCancerGenome: not present;CancerHotspot: no;3DHotspot: no	MutationAssessor: impact: low, score: 1.32;SIFT: impact: tolerated, score: 0.37;Polyphen-2: impact: benign, score: 0.017	Missense_Mutation	SNP	Diploid	G	A	UCEC	34.3229	No	8380-03-01	C54.1	UEC	34.3229	0:LIVING	With Tumor	24.8545	1:PROGRESSION		Primary	Female	Matched	UCEC_POLE	No	Yes	Gynecologic Oncology Group	435.7	Uterus	Endometrioid Endometrial Adenocarcinoma
Uterine Corpus Endometrial Carcinoma (TCGA, PanCancer Atlas)	TCGA-BG-A222-01	Endometrial Cancer	Uterine Endometrioid Carcinoma	D22G	OncoKB: NA;CIViC: NA;MyCancerGenome: not present;CancerHotspot: no;3DHotspot: no	MutationAssessor: impact: medium, score: 2.715;SIFT: impact: deleterious, score: 0.03;Polyphen-2: impact: benign, score: 0.327	Missense_Mutation	SNP	Diploid	T	C	UCEC	9.56702	No	8380-03-01	C54.1	UEC	9.56702	0:LIVING	NA	9.56702	0:CENSORED		Primary	Female	Matched	UCEC_MSI	No	Yes	University of Pittsburgh	143.467	Uterus	Endometrioid Endometrial Adenocarcinoma
Uterine Corpus Endometrial Carcinoma (TCGA, PanCancer Atlas)	TCGA-D1-A17Q-01	Endometrial Cancer	Uterine Endometrioid Carcinoma	R237L	OncoKB: NA;CIViC: NA;MyCancerGenome: not present;CancerHotspot: no;3DHotspot: no	MutationAssessor: impact: high, score: 4.92;SIFT: impact: deleterious, score: 0;Polyphen-2: impact: probably_damaging, score: 0.998	Missense_Mutation	SNP	Diploid	C	A	UCEC	1.77532	No	8380-03-01	C54.1	UEC	1.77532	0:LIVING	Tumor Free	1.77532	0:CENSORED		Primary	Female	Matched	UCEC_POLE	No	Yes	Mayo Clinic	198.967	Uterus	Endometrioid Endometrial Adenocarcinoma
Lung Adenocarcinoma (TCGA, PanCancer Atlas)	TCGA-50-5931-01	Non-Small Cell Lung Cancer	Lung Adenocarcinoma	N178K	OncoKB: NA;CIViC: NA;MyCancerGenome: not present;CancerHotspot: no;3DHotspot: no	MutationAssessor: impact: low, score: 1.92;SIFT: impact: deleterious, score: 0;Polyphen-2: impact: benign, score: 0.134	Missense_Mutation	SNP	Gain	G	C	LUAD	14.2683	No	8140-03-01	C34.1	LUAD	14.2683	1:DECEASED	Tumor Free	13.9724	1:PROGRESSION		Primary	Female	Matched	LUAD	No	Yes	University of Pittsburgh	9.26667	Lung	Lung Adenocarcinoma (NOS)
Lung Adenocarcinoma (TCGA, PanCancer Atlas)	TCGA-95-7043-01	Non-Small Cell Lung Cancer	Lung Adenocarcinoma	G112C	OncoKB: NA;CIViC: NA;MyCancerGenome: not present;CancerHotspot: no;3DHotspot: no	MutationAssessor: impact: neutral, score: 0.345;SIFT: impact: tolerated, score: 0.19;Polyphen-2: impact: possibly_damaging, score: 0.722	Missense_Mutation	SNP	Gain	C	A	LUAD	16.5368	No	8255-03-01	C34.1	LUAD	16.5368	1:DECEASED	Tumor Free	16.5368	1:PROGRESSION		Primary	Female	Matched	LUAD	Yes	No	Washington University - Emory	34.1667	Lung	Lung Adenocarcinoma, Mixed Subtype
Esophageal Adenocarcinoma (TCGA, PanCancer Atlas)	TCGA-JY-A6FH-01	Esophagogastric Cancer	Esophageal Adenocarcinoma	G163R	OncoKB: NA;CIViC: NA;MyCancerGenome: not present;CancerHotspot: no;3DHotspot: no	MutationAssessor: impact: medium, score: 2.05;SIFT: impact: tolerated, score: 0.19;Polyphen-2: impact: possibly_damaging, score: 0.745	Missense_Mutation	SNP	ShallowDel	C	G	ESCA	47.3748	No	8140-03-01	C15.5	ESCA	47.3748	0:LIVING	Tumor Free	24.6244	1:PROGRESSION	Yes	Primary	Male	Matched	ESCA_CIN	No	Yes	University Health Network	4.03333	Esophagus	Esophagus Adenocarcinoma (NOS)
Skin Cutaneous Melanoma (TCGA, PanCancer Atlas)	TCGA-EE-A2GH-06	Melanoma	Cutaneous Melanoma	S184C	OncoKB: NA;CIViC: NA;MyCancerGenome: not present;CancerHotspot: no;3DHotspot: no	MutationAssessor: impact: medium, score: 3.395;SIFT: impact: deleterious, score: 0;Polyphen-2: impact: probably_damaging, score: 0.936	Missense_Mutation	SNP	Gain	G	C	SKCM	220.239	No	8720-03-01	C77.3	SKCM	220.239	0:LIVING	Tumor Free	220.239	0:CENSORED		Metastasis	Male	Matched	SKCM	No	Yes	University of Sydney	35.1333	Regional Lymph Node|Trunk	Skin Cutaneous Melanoma
Skin Cutaneous Melanoma (TCGA, PanCancer Atlas)	TCGA-FW-A3R5-06	Melanoma	Cutaneous Melanoma	Q234*	OncoKB: NA;CIViC: NA;MyCancerGenome: not present;CancerHotspot: no;3DHotspot: no	MutationAssessor: NA;SIFT: NA;Polyphen-2: NA	Nonsense_Mutation	SNP	ShallowDel	G	A	SKCM	36.953	No	8720-03-01	C77.0	SKCM	36.953	0:LIVING	NA	36.953	0:CENSORED		Metastasis	Male	Matched	SKCM	Yes	No	International Genomics Consortium	1052.2	Head and Neck|Regional Lymph Node	Skin Cutaneous Melanoma
Skin Cutaneous Melanoma (TCGA, PanCancer Atlas)	TCGA-EE-A2GR-06	Melanoma	Cutaneous Melanoma	P29H	OncoKB: NA;CIViC: NA;MyCancerGenome: not present;CancerHotspot: no;3DHotspot: no	MutationAssessor: impact: medium, score: 2.08;SIFT: impact: tolerated, score: 0.08;Polyphen-2: impact: possibly_damaging, score: 0.744	Missense_Mutation	SNP	Diploid	G	T	SKCM	42.7721	No	8720-03-01	C49.1	SKCM	42.7721	1:DECEASED	Tumor Free	42.7721	1:PROGRESSION		Metastasis	Male	Matched	SKCM	Yes	No	University of Sydney	58.3667	Extremities|Regional Cutaneous or Subcutaneous Tissue	Skin Cutaneous Melanoma
Stomach Adenocarcinoma (TCGA, PanCancer Atlas)	TCGA-BR-8487-01	Esophagogastric Cancer	Stomach Adenocarcinoma	G31D	OncoKB: NA;CIViC: NA;MyCancerGenome: not present;CancerHotspot: no;3DHotspot: no	MutationAssessor: impact: medium, score: 2.455;SIFT: impact: tolerated, score: 0.09;Polyphen-2: impact: possibly_damaging, score: 0.874	Missense_Mutation	SNP	Diploid	C	T	STAD	1.1178	No	8140-03-01	C16.3	STAD	1.1178	0:LIVING	Tumor Free	1.1178	0:CENSORED	Yes	Primary	Female	Matched	STAD_MSI	Yes	No	Asterand	89.5667	Stomach	Stomach Adenocarcinoma (NOS)
Stomach Adenocarcinoma (TCGA, PanCancer Atlas)	TCGA-D7-5577-01	Esophagogastric Cancer	Tubular Stomach Adenocarcinoma	R183C	OncoKB: NA;CIViC: NA;MyCancerGenome: not present;CancerHotspot: no;3DHotspot: no	MutationAssessor: impact: medium, score: 2.865;SIFT: impact: deleterious, score: 0;Polyphen-2: impact: probably_damaging, score: 0.994	Missense_Mutation	SNP	Diploid	G	A	STAD	25.7093	No	8211-03-01	C16.0	TSTAD	25.7093	1:DECEASED	Tumor Free	12.3615	1:PROGRESSION	Yes	Primary	Female	Matched	STAD_EBV	Yes	No	Greater Poland Cancer Center	3.83333	Stomach	Stomach Intestinal Adenocarcinoma, Tubular Type
Stomach Adenocarcinoma (TCGA, PanCancer Atlas)	TCGA-VQ-A8P2-01	Esophagogastric Cancer	Mucinous Stomach Adenocarcinoma	R183H	OncoKB: NA;CIViC: NA;MyCancerGenome: not present;CancerHotspot: no;3DHotspot: no	MutationAssessor: impact: medium, score: 2.61;SIFT: impact: deleterious, score: 0;Polyphen-2: impact: probably_damaging, score: 0.994	Missense_Mutation	SNP	Diploid	C	T	STAD	38.1366	No	8480-03-01	C16.2	MSTAD	38.1366	0:LIVING	Tumor Free	38.1366	0:CENSORED	Yes	Primary	Male	Matched	STAD_MSI	No	Yes	Barretos Cancer Hospital	213.033	Stomach	Stomach Intestinal Adenocarcinoma, Mucinous Type
Breast Invasive Carcinoma (TCGA, PanCancer Atlas)	TCGA-E2-A1IN-01	Breast Cancer	Breast Invasive Ductal Carcinoma	E139Kfs*62	OncoKB: NA;CIViC: NA;MyCancerGenome: not present;CancerHotspot: no;3DHotspot: no	MutationAssessor: NA;SIFT: NA;Polyphen-2: NA	Frame_Shift_Del	DEL	Diploid	C	-	BRCA	22.1915	No	8500-03-01	C50.9	IDC	22.1915	0:LIVING	Tumor Free	22.1915	0:CENSORED	Yes	Primary	Female	Matched	BRCA_LumA	No	Yes	Roswell Park	5.4	Breast	Infiltrating Ductal Carcinoma
Breast Invasive Carcinoma (TCGA, PanCancer Atlas)	TCGA-D8-A1JA-01	Breast Cancer	Breast Invasive Ductal Carcinoma	R236W	OncoKB: NA;CIViC: NA;MyCancerGenome: not present;CancerHotspot: no;3DHotspot: no	MutationAssessor: impact: high, score: 4.47;SIFT: impact: deleterious, score: 0;Polyphen-2: impact: probably_damaging, score: 0.999	Missense_Mutation	SNP	Amp	G	A	BRCA	16.5039	No	8500-03-01	C50.9	IDC	16.5039	0:LIVING	Tumor Free	14.1697	1:PROGRESSION	No	Primary	Female	Matched	BRCA_Her2	Yes	No	Greater Poland Cancer Center	26.6	Breast	Infiltrating Ductal Carcinoma
Pancreatic Adenocarcinoma (TCGA, PanCancer Atlas)	TCGA-IB-7651-01	Pancreatic Cancer	Pancreatic Adenocarcinoma	G143V	OncoKB: NA;CIViC: NA;MyCancerGenome: not present;CancerHotspot: no;3DHotspot: no	MutationAssessor: impact: medium, score: 2.49;SIFT: impact: tolerated, score: 0.19;Polyphen-2: impact: benign, score: 0.378	Missense_Mutation	SNP	Diploid	C	A	PAAD	19.8244	No	8500-03-01	C25.0	PAAD	19.8244	1:DECEASED	With Tumor	16.1752	1:PROGRESSION	Yes	Primary	Female	Matched	PAAD	No	Yes	Alberta Health Services	479.3	Pancreas	Pancreas Adenocarcinoma, Ductal Type
Colorectal Adenocarcinoma (TCGA, PanCancer Atlas)	TCGA-AA-3663-01	Colorectal Cancer	Colon Adenocarcinoma	R236W	OncoKB: NA;CIViC: NA;MyCancerGenome: not present;CancerHotspot: no;3DHotspot: no	MutationAssessor: impact: high, score: 4.47;SIFT: impact: deleterious, score: 0;Polyphen-2: impact: probably_damaging, score: 0.999	Missense_Mutation	SNP	Diploid	G	A	COAD	6.96979	No	8140-03-01	C18.0	COAD	6.96979	0:LIVING	With Tumor	6.96979	0:CENSORED	Yes	Primary	Male	Matched	COAD_MSI	No	Yes	Indivumed	64.8667	Colon	Colon Adenocarcinoma
Colorectal Adenocarcinoma (TCGA, PanCancer Atlas)	TCGA-AG-A02N-01	Colorectal Cancer	Rectal Adenocarcinoma	L138S	OncoKB: NA;CIViC: NA;MyCancerGenome: not present;CancerHotspot: no;3DHotspot: no	MutationAssessor: impact: low, score: 1.505;SIFT: impact: tolerated, score: 0.44;Polyphen-2: impact: benign, score: 0.26	Missense_Mutation	SNP	Diploid	A	G	READ	61.9719	No	8140-03-01	C20.9	READ	61.9719	0:LIVING	With Tumor	61.9719	0:CENSORED	Yes	Primary	Male	Matched	READ_MSI	No	Yes	Indivumed	36.3	Rectum	Rectal Adenocarcinoma
Colorectal Adenocarcinoma (TCGA, PanCancer Atlas)	TCGA-G4-6588-01	Colorectal Cancer	Colon Adenocarcinoma	K202del	OncoKB: NA;CIViC: NA;MyCancerGenome: not present;CancerHotspot: no;3DHotspot: no	MutationAssessor: NA;SIFT: NA;Polyphen-2: NA	In_Frame_Del	DEL	Diploid	CTT	-	COAD	26.1696	No	8140-03-01	C18.0	COAD	26.1696	0:LIVING	Tumor Free	26.1696	0:CENSORED	No	Primary	Female	Matched	COAD_MSI	No	Yes	Roswell Park	65.5667	Colon	Colon Adenocarcinoma
Kidney Renal Papillary Cell Carcinoma (TCGA, PanCancer Atlas)	TCGA-A4-A6HP-01	Renal Non-Clear Cell Carcinoma	Papillary Renal Cell Carcinoma	E119G	OncoKB: NA;CIViC: NA;MyCancerGenome: not present;CancerHotspot: no;3DHotspot: no	MutationAssessor: impact: medium, score: 3.32;SIFT: impact: tolerated, score: 0.07;Polyphen-2: impact: benign, score: 0.157	Missense_Mutation	SNP	Gain	T	C	KIRP	12.4601	No	8260-03-01	C64.9	PRCC	12.4601	0:LIVING	Tumor Free	12.4601	0:CENSORED	No	Primary	Male	Matched	KIRP	Yes	No	International Genomics Consortium	5.13333	Kidney	Kidney Papillary Renal Cell Carcinoma
Kidney Renal Papillary Cell Carcinoma (TCGA, PanCancer Atlas)	TCGA-A4-A6HP-01	Renal Non-Clear Cell Carcinoma	Papillary Renal Cell Carcinoma	E119K	OncoKB: NA;CIViC: NA;MyCancerGenome: not present;CancerHotspot: no;3DHotspot: no	MutationAssessor: impact: medium, score: 2.97;SIFT: impact: deleterious, score: 0.05;Polyphen-2: impact: benign, score: 0.157	Missense_Mutation	SNP	Gain	C	T	KIRP	12.4601	No	8260-03-01	C64.9	PRCC	12.4601	0:LIVING	Tumor Free	12.4601	0:CENSORED	No	Primary	Male	Matched	KIRP	Yes	No	International Genomics Consortium	5.13333	Kidney	Kidney Papillary Renal Cell Carcinoma
Cervical Squamous Cell Carcinoma (TCGA, PanCancer Atlas)	TCGA-EA-A3HU-01	Cervical Cancer	Cervical Squamous Cell Carcinoma	S49L	OncoKB: NA;CIViC: NA;MyCancerGenome: not present;CancerHotspot: no;3DHotspot: no	MutationAssessor: impact: medium, score: 3.445;SIFT: impact: deleterious, score: 0.01;Polyphen-2: impact: probably_damaging, score: 0.997	Missense_Mutation	SNP		G	A	CESC	33.3037	No	8070-03-01	C53.9	CESC	33.3037	0:LIVING	Tumor Free	33.3037	0:CENSORED	Yes	Primary	Female	Matched	CESC	Yes	No	Asterand	32.5333	Cervical	Cervical Squamous Cell Carcinoma
